# Supplementary material for: Autonomic nervous system response to remote ischemic conditioning: heart rate variability assessment
Source: PubMed Central journal article supplement (PMC6734354; doi:10.1186/s12872-019-1181-5), 2019-09-09
Supplement: 12872_2019_1181_MOESM3_ESM.pdf [file 12872_2019_1181_MOESM3_ESM.pdf]

|                                    | Included subjects<br>(n=18) | Senior subjects<br>(n=8) | Young subjects<br>(n=10) |
|------------------------------------|-----------------------------|--------------------------|--------------------------|
| <b>Demographics</b>                |                             |                          |                          |
| Age, years                         | 47.0 ± 21.9                 | 69.6 ± 7.6               | 28.9 ± 6.3               |
| Female sex                         | 11 (61.1)                   | 6 (75.0)                 | 5 (50)                   |
| <b>Cardiovascular risk factors</b> |                             |                          |                          |
| Arterial Hypertension              | 5 (27.8)                    | 5 (62.5)                 | 0 (0)                    |
| Diabetes                           | 2 (11.1)                    | 2 (25.0)                 | 0 (0)                    |
| Dyslipidemia                       | 6 (33.3)                    | 6 (75.0)                 | 0 (0)                    |
| Smoking                            | 3 (16.7)                    | 2 (25.0)                 | 1 (10)                   |
| Obesity                            | 1 (5.6)                     | 1 (12.5)                 | 0 (0)                    |
| Coronary artery disease            | 0 (0)                       | 0 (0)                    | 0 (0)                    |
| Atrial fibrillation                | 0 (0)                       | 0 (0)                    | 0 (0)                    |
| <b>Current medication</b>          |                             |                          |                          |
| Beta-blocker                       | 1 (5.6)                     | 1 (12.5)                 | 0 (0)                    |
| Alfa-blocker                       | 1 (5.6)                     | 1 (12.5)                 | 0 (0)                    |
| Calcium channel blockers           | 1 (5.6)                     | 1 (12.5)                 | 0 (0)                    |

*Values are presented as mean ± standard deviation or numbers (proportions).*
