# Supplementary material for: Autonomic nervous system response to remote ischemic conditioning: heart rate variability assessment
Source: PubMed Central journal article supplement (PMC6734354; doi:10.1186/s12872-019-1181-5), 2019-09-09
Supplement: 12872_2019_1181_MOESM4_ESM.pdf [file 12872_2019_1181_MOESM4_ESM.pdf]

**Table S2 – Global population analysis for the first and last 10 minutes and occlusion and non-occlusion intervals**

|                            |                          | Global                |                      |               | Wilcoxon signed-rank test     |
|----------------------------|--------------------------|-----------------------|----------------------|---------------|-------------------------------|
|                            |                          | First 10 minutes Mean | Last 10 minutes Mean | First vs Last | p-value: Before - After pairs |
| <b>Time Features</b>       | Mean R-R Interval (ms)   | 819,069               | 834,266              | Last higher   | 0,076                         |
|                            | Median R-R Interval (ms) | 821,868               | 837,588              | Last higher   | 0,107                         |
|                            | pNN50 (%)                | 11,351                | 11,670               | Last higher   | 0,619                         |
|                            | rMSSD (ms)               | 32,430                | 34,152               | Last higher   | 0,435                         |
| <b>Frequency Features</b>  | nuLF PSD (%)             | 40,971                | 44,029               | Last higher   | 0,193                         |
|                            | nuHF PSD (%)             | 36,176                | 32,912               | First higher  | 0,107                         |
|                            | nuLF/nuHF ratio          | 1,424                 | 1,644                | Last higher   | 0,149                         |
| <b>Non-linear Features</b> | SD1 axis (ms)            | 22,931                | 24,148               | Last higher   | 0,435                         |
|                            | SD2 axis (ms)            | 69,039                | 78,627               | Last higher   | <b>0,044</b>                  |
|                            | SD1/SD2                  | 0,352                 | 0,316                | First higher  | 0,149                         |

**Mean R-R Interval:** mean value of the time difference between beats; **Median R-R Interval:** median value of the time difference between beats; **pNN50:** percentage of beats that differ more than 50ms from the previous; **rMSSD:** root mean square of the successive differences; **nuLF PSD:** normalized power spectrum of the 0.04 to 0.15Hz band; **nuHF PSD:** normalized power spectrum of the 0.15 to 0.4 Hz band; **nuLF/nuHF:** ratio between the bands; **SD1 axis:** non-linear feature associated with short-term changes; **SD2 axis:** non-linear feature associated with long-term changes and **SD1/SD2:** ratio between axis.

Supplementary table 2 (cont.)

|                            |                          | Non-occlusion intervals<br>Mean | Occlusion intervals<br>Mean | Non-Occlusion vs<br>Occlusion | Wilcoxon signed-rank<br>test<br>p-value: Non-Occlusion<br>- Occlusion |
|----------------------------|--------------------------|---------------------------------|-----------------------------|-------------------------------|-----------------------------------------------------------------------|
| <b>Time Features</b>       | Mean R-R Interval (ms)   | 827,052                         | 823,577                     | Non-occlusion higher          | 0,210                                                                 |
|                            | Median R-R Interval (ms) | 829,437                         | 825,779                     | Non-occlusion higher          | 0,177                                                                 |
|                            | pNN50 (%)                | 11,541                          | 11,112                      | Non-occlusion higher          | 0,084                                                                 |
|                            | rMSSD (ms)               | 33,639                          | 32,572                      | Non-occlusion higher          | <b>0,044</b>                                                          |
| <b>Frequency Features</b>  | nuLF PSD (%)             | 42,690                          | 43,588                      | Occlusion higher              | 0,586                                                                 |
|                            | nuHF PSD (%)             | 33,872                          | 33,824                      | Non-occlusion higher          | 0,868                                                                 |
|                            | nuLF/nuHF ratio          | 1,583                           | 1,706                       | Occlusion higher              | 0,723                                                                 |
| <b>Non-linear Features</b> | SD1 axis (ms)            | 23,785                          | 23,031                      | Non-occlusion higher          | <b>0,044</b>                                                          |
|                            | SD2 axis (ms)            | 74,078                          | 71,451                      | Non-occlusion higher          | 0,084                                                                 |
|                            | SD1/SD2                  | 0,335                           | 0,327                       | Non-occlusion higher          | 0,332                                                                 |

**Mean R-R Interval:** mean value of the time difference between beats; **Median R-R Interval:** median value of the time difference between beats; **pNN50:** percentage of beats that differ more than 50ms from the previous; **rMSSD:** root mean square of the successive differences; **nuLF PSD:** normalized power spectrum of the 0.04 to 0.15Hz band; **nuHF PSD:** normalized power spectrum of the 0.15 to 0.4 Hz band; **nuLF/nuHF:** ratio between the bands; **SD1 axis:** non-linear feature associated with short-term changes; **SD2 axis:** non-linear feature associated with long-term changes and **SD1/SD2:** ratio between axis.
