# Supplementary material for: Autonomic nervous system response to remote ischemic conditioning: heart rate variability assessment
Source: PubMed Central journal article supplement (PMC6734354; doi:10.1186/s12872-019-1181-5), 2019-09-09
Supplement: 12872_2019_1181_MOESM6_ESM.pdf [file 12872_2019_1181_MOESM6_ESM.pdf]

**Supplementary Table 4 - Young population analysis for the first and last 10 minutes and occlusion and non-occlusion intervals**

| Young                      |                          | First 10 minutes<br>Mean | Last 10 minutes<br>Mean | First vs Last | Wilcoxon signed-rank test<br>p-value: Before - After pairs |
|----------------------------|--------------------------|--------------------------|-------------------------|---------------|------------------------------------------------------------|
| <b>Time Features</b>       | Mean R-R Interval (ms)   | 808,285                  | 819,949                 | Last higher   | 0,285                                                      |
|                            | Median R-R Interval (ms) | 811,325                  | 822,175                 | Last higher   | 0,359                                                      |
|                            | pNN50 (%)                | 16,039                   | 16,830                  | Last higher   | 0,508                                                      |
|                            | rMSSD (ms)               | 38,061                   | 39,792                  | Last higher   | 0,445                                                      |
| <b>Frequency Features</b>  | nuLF PSD (%)             | 46,850                   | 48,150                  | Last higher   | 0,444                                                      |
|                            | nuHF PSD (%)             | 29,700                   | 27,450                  | First higher  | 0,102                                                      |
|                            | nuLF/nuHF ratio          | 1,791                    | 1,985                   | Last higher   | 0,241                                                      |
| <b>Non-linear Features</b> | SD1 axis (ms)            | 26,912                   | 28,136                  | Last higher   | 0,445                                                      |
|                            | SD2 axis (ms)            | 86,350                   | 92,111                  | Last higher   | 0,508                                                      |
|                            | SD1/SD2                  | 0,308                    | 0,307                   | First higher  | 0,878                                                      |

**Mean R-R Interval:** mean value of the time difference between beats; **Median R-R Interval:** median value of the time difference between beats; **pNN50:** percentage of beats that differ more than 50ms from the previous; **rMSSD:** root mean square of the successive differences; **nuLF PSD:** normalized power spectrum of the 0.04 to 0.15Hz band; **nuHF PSD:** normalized power spectrum of the 0.15 to 0.4 Hz band; **nuLF/nuHF:** ratio between the bands; **SD1 axis:** non-linear feature associated with short-term changes; **SD2 axis:** non-linear feature associated with long-term changes and **SD1/SD2:** ratio between axis.

**Supplementary Table 4 (cont.)**

|                            |                          | Non-occlusion intervals<br>Mean | Occlusion intervals<br>Mean | Non-Occlusion vs<br>Occlusion | Wilcoxon signed-rank<br>test<br>p-value: Non-<br>Occlusion - Occlusion |
|----------------------------|--------------------------|---------------------------------|-----------------------------|-------------------------------|------------------------------------------------------------------------|
| <b>Time Features</b>       | Mean R-R Interval (ms)   | 816,104                         | 816,448                     | Occlusion higher              | 0,959                                                                  |
|                            | Median R-R Interval (ms) | 818,261                         | 819,087                     | Occlusion higher              | 0,878                                                                  |
|                            | pNN50 (%)                | 16,602                          | 16,042                      | Non-occlusion higher          | 0,241                                                                  |
|                            | rMSSD (ms)               | 39,240                          | 38,422                      | Non-occlusion higher          | 0,093                                                                  |
| <b>Frequency Features</b>  | nuLF PSD (%)             | 47,632                          | 48,800                      | Occlusion higher              | 0,575                                                                  |
|                            | nuHF PSD (%)             | 28,142                          | 28,800                      | Occlusion higher              | 0,878                                                                  |
|                            | nuLF/nuHF ratio          | 1,924                           | 2,066                       | Occlusion higher              | 0,799                                                                  |
| <b>Non-linear Features</b> | SD1 axis (ms)            | 27,746                          | 27,168                      | Non-occlusion higher          | 0,093                                                                  |
|                            | SD2 axis (ms)            | 89,882                          | 87,798                      | Non-occlusion higher          | 0,333                                                                  |
|                            | SD1/SD2                  | 0,310                           | 0,308                       | Non-occlusion higher          | 0,721                                                                  |

**Mean R-R Interval:** mean value of the time difference between beats; **Median R-R Interval:** median value of the time difference between beats; **pNN50:** percentage of beats that differ more than 50ms from the previous; **rMSSD:** root mean square of the successive differences; **nuLF PSD:** normalized power spectrum of the 0.04 to 0.15Hz band; **nuHF PSD:** normalized power spectrum of the 0.15 to 0.4 Hz band; **nuLF/nuHF:** ratio between the bands; **SD1 axis:** non-linear feature associated with short-term changes; **SD2 axis:** non-linear feature associated with long-term changes and **SD1/SD2:** ratio between axis.
