# Supplementary material for: Autonomic nervous system response to remote ischemic conditioning: heart rate variability assessment
Source: Springer Nature journal article supplement (doi:10.1186/s12872-019-1181-5), 2019-09-09
Supplement: MOESM5 [file 17153390]

**Table S3 - Senior population analysis for the first and last 10 minutes and occlusion and non-occlusion intervals**

|                            |                          | Senior                   |                         |               |                                                            |
|----------------------------|--------------------------|--------------------------|-------------------------|---------------|------------------------------------------------------------|
|                            |                          | First 10 minutes<br>Mean | Last 10 minutes<br>Mean | First vs Last | Wilcoxon signed-rank test<br>p-value: Before - After pairs |
| <b>Time Features</b>       | Mean R-R Interval (ms)   | 834,475                  | 854,718                 | Last higher   | 0,128                                                      |
|                            | Median R-R Interval (ms) | 836,929                  | 859,607                 | Last higher   | 0,176                                                      |
|                            | pNN50 (%)                | 4,655                    | 4,298                   | First higher  | 0,866                                                      |
|                            | rMSSD (ms)               | 24,387                   | 26,096                  | Last higher   | 0,866                                                      |
| <b>Frequency Features</b>  | nuLF PSD (%)             | 32,571                   | 38,143                  | Last higher   | 0,310                                                      |
|                            | nuHF PSD (%)             | 45,429                   | 40,714                  | First higher  | 0,310                                                      |
|                            | nuLF/nuHF ratio          | 0,900                    | 1,158                   | Last higher   | 0,398                                                      |
| <b>Non-linear Features</b> | SD1 axis (ms)            | 17,244                   | 18,452                  | Last higher   | 0,866                                                      |
|                            | SD2 axis (ms)            | 44,309                   | 59,366                  | Last higher   | <b>0,018</b>                                               |
|                            | SD1/SD2                  | 0,416                    | 0,329                   | First higher  | 0,128                                                      |

**Mean R-R Interval:** mean value of the time difference between beats; **Median R-R Interval:** median value of the time difference between beats; **pNN50:** percentage of beats that differ more than 50ms from the previous; **rMSSD:** root mean square of the successive differences; **nuLF PSD:** normalized power spectrum of the 0.04 to 0.15Hz band; **nuHF PSD:** normalized power spectrum of the 0.15 to 0.4 Hz band; **nuLF/nuHF:** ratio between the bands; **SD1 axis:** non-linear feature associated with short-term changes; **SD2 axis:** non-linear feature associated with long-term changes and **SD1/SD2:** ratio between axis.

**Table S3 (cont.)**

|                            |                          | Non-occlusion intervals<br>Mean | Occlusion intervals<br>Mean | Non-Occlusion vs<br>Occlusion | Wilcoxon signed-rank test<br>p-value: Non-Occlusion -<br>Occlusion |
|----------------------------|--------------------------|---------------------------------|-----------------------------|-------------------------------|--------------------------------------------------------------------|
| <b>Time Features</b>       | Mean R-R Interval (ms)   | 842,691                         | 833,762                     | Non-occlusion higher          | 0,176                                                              |
|                            | Median R-R Interval (ms) | 845,401                         | 835,339                     | Non-occlusion higher          | 0,176                                                              |
|                            | pNN50 (%)                | 4,310                           | 4,069                       | Non-occlusion higher          | 0,237                                                              |
|                            | rMSSD (ms)               | 25,637                          | 24,216                      | Non-occlusion higher          | 0,310                                                              |
| <b>Frequency Features</b>  | nuLF PSD (%)             | 35,629                          | 36,143                      | Occlusion higher              | 0,612                                                              |
|                            | nuHF PSD (%)             | 42,058                          | 41,000                      | Non-occlusion higher          | 0,612                                                              |
|                            | nuLF/nuHF ratio          | 1,096                           | 1,191                       | Occlusion higher              | 0,866                                                              |
| <b>Non-linear Features</b> | SD1 axis (ms)            | 18,128                          | 17,123                      | Non-occlusion higher          | 0,310                                                              |
|                            | SD2 axis (ms)            | 51,500                          | 48,099                      | Non-occlusion higher          | 0,176                                                              |
|                            | SD1/SD2                  | 0,371                           | 0,353                       | Non-occlusion higher          | 0,237                                                              |

**Mean R-R Interval:** mean value of the time difference between beats; **Median R-R Interval:** median value of the time difference between beats; **pNN50:** percentage of beats that differ more than 50ms from the previous; **rMSSD:** root mean square of the successive differences; **nuLF PSD:** normalized power spectrum of the 0.04 to 0.15Hz band; **nuHF PSD:** normalized power spectrum of the 0.15 to 0.4 Hz band; **nuLF/nuHF:** ratio between the bands; **SD1 axis:** non-linear feature associated with short-term changes; **SD2 axis:** non-linear feature associated with long-term changes and **SD1/SD2:** ratio between axis.
